# Supplementary material
Source: PubMed Central journal article supplement (PMC4459019)
Supplement: bph0172-3003-sd1.pdf [file bph0172-3003-sd1.pdf]

Supplementary Figure 1

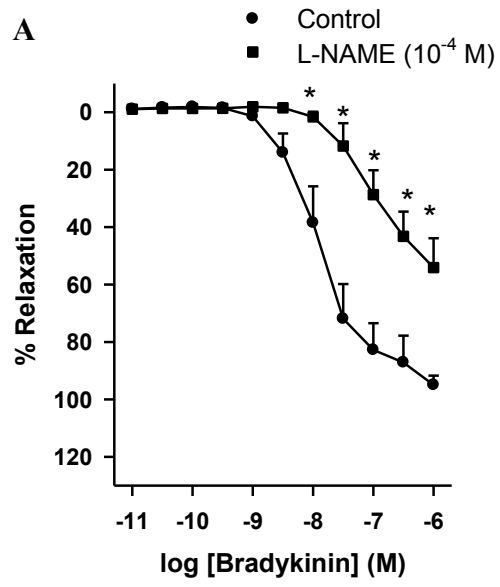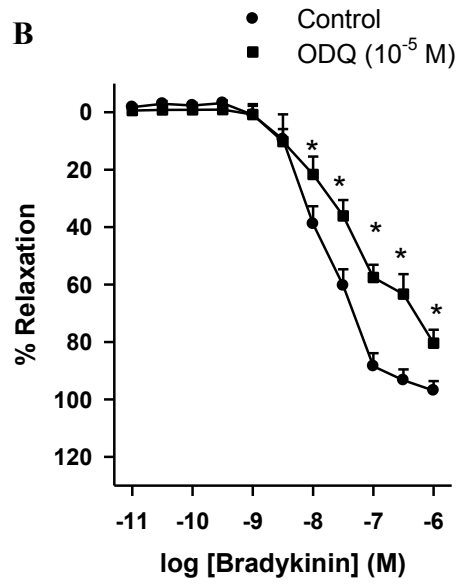

Supplementary Figure 2

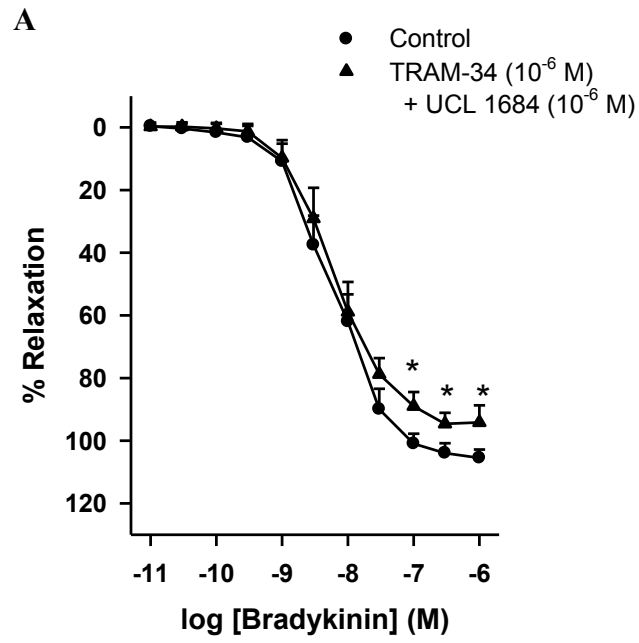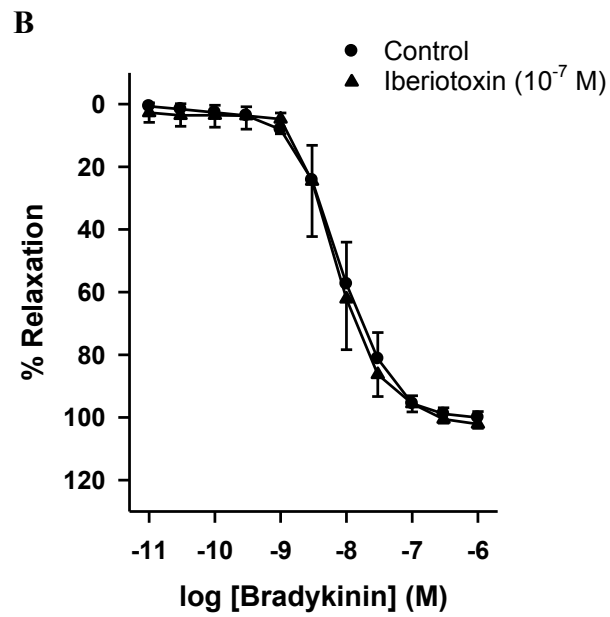

Supplementary Figure 3

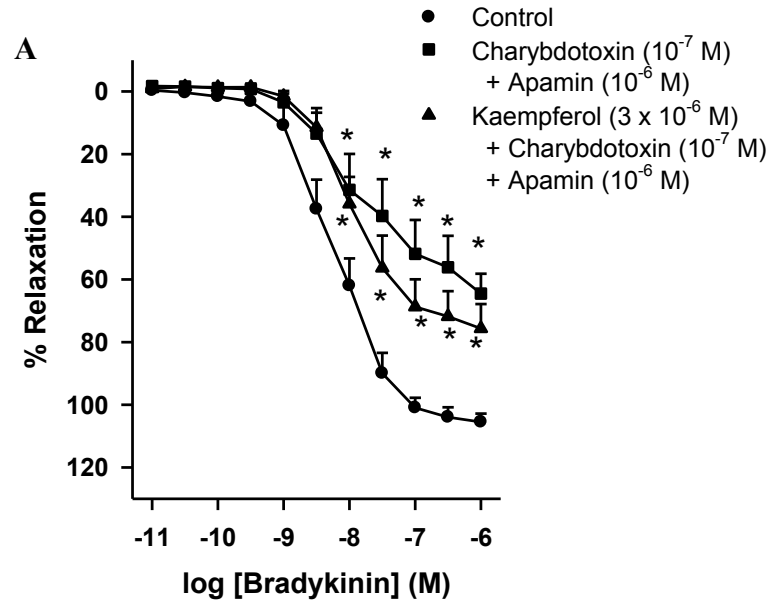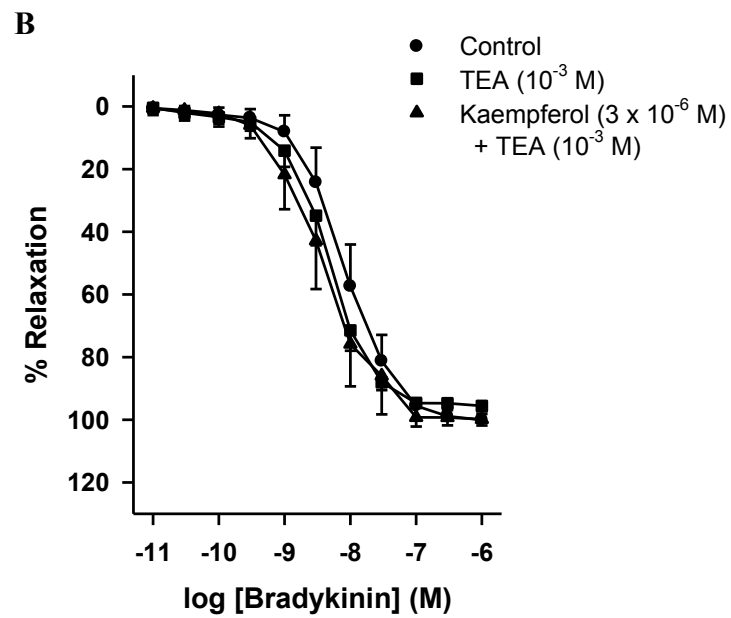

Supplementary Figure 4

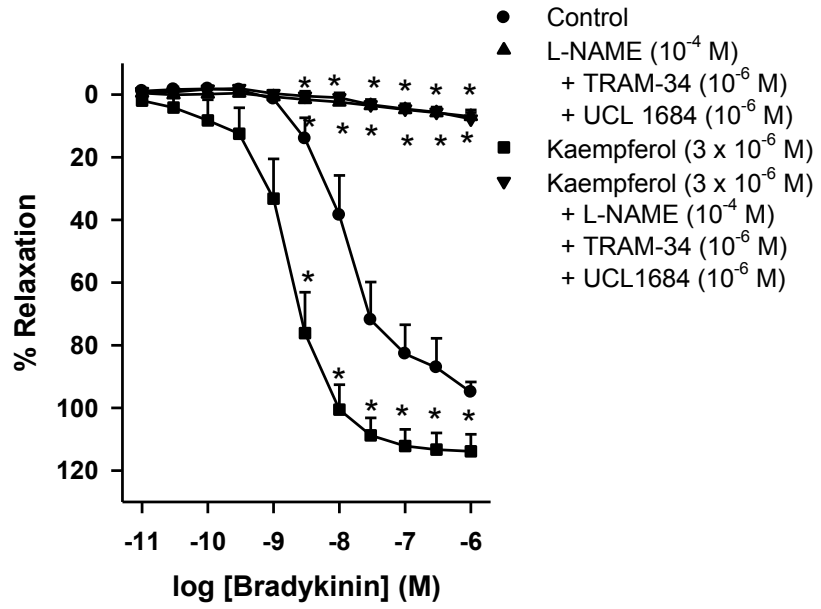

Supplementary Figure 5

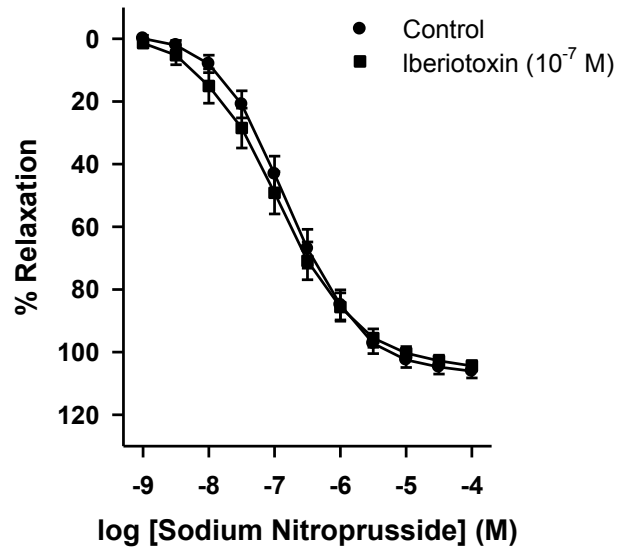

**Supplementary Figure 1.** Effect of (A) nitric oxide synthase inhibitor or (B) guanylyl cyclase inhibitor on bradykinin-induced relaxations. Rings from porcine coronary arteries were incubated with either L-NAME ( $10^{-4}$  M) or ODQ ( $10^{-5}$  M) for 30 minutes. Rings were then contracted with U46619 ( $3 \times 10^{-8}$  M) before bradykinin was cumulatively added.  $n = 6-7$ . \* $P < 0.05$  when compared to the control group.

**Supplementary Figure 2.** Effect of (A) intermediate plus small conductance calcium-activated potassium channels inhibitors or (B) large conductance calcium-activated potassium channel inhibitor on bradykinin-induced relaxations. Rings from porcine coronary arteries were incubated with TRAM-34 ( $10^{-6}$  M) plus UCL 1684 ( $10^{-6}$  M) or iberiotoxin ( $10^{-7}$  M) for 30 minutes. Rings were then contracted with U46619 ( $3 \times 10^{-8}$  M) before bradykinin was cumulatively added.  $n = 7-8$ . \* $P < 0.05$  when compared to the control group.

**Supplementary Figure 3.** Effect of (A) large and intermediate plus small conductance calcium-activated potassium channels inhibitors and (B) non-selective calcium-activated potassium channel inhibitor on bradykinin-induced relaxations in the absence or presence of kaempferol. Rings from porcine coronary arteries were incubated with charybdotoxin ( $10^{-7}$  M) plus apamin ( $10^{-6}$  M), TEA ( $10^{-3}$  M), with or without kaempferol ( $3 \times 10^{-6}$  M) for 30 minutes. Rings were then contracted with U46619 ( $3 \times 10^{-8}$  M) before bradykinin was cumulatively added.  $n = 7-8$ . \* $P < 0.05$  when compared to the control group.

**Supplementary Figure 4.** Effect of the combination of nitric oxide synthase and intermediate plus small conductance calcium-activated potassium channels inhibitors on bradykinin-induced relaxations in the absence or presence of kaempferol. Rings from porcine coronary arteries were incubated with L-NAME ( $10^{-4}$  M), TRAM-34 ( $10^{-6}$  M) plus UCL 1684 ( $10^{-6}$  M) and/or kaempferol ( $3 \times 10^{-6}$  M) for 30 minutes. Rings were then contracted with U46619 ( $3 \times 10^{-8}$  M) before bradykinin was cumulatively added. n = 7-8. \*P<0.05 when compared to the control group.

**Supplementary Figure 5.** Effect of large conductance calcium-activated potassium channel inhibitor on sodium nitroprusside-induced relaxations. Rings from porcine coronary arteries were incubated with or without iberiotoxin ( $10^{-7}$  M) for 30 minutes. Rings were then contracted with U46619 ( $3 \times 10^{-8}$  M) before sodium nitroprusside was cumulatively added. n = 6-7.

*Supplementary Table 1.* Effects of acute treatment with different flavonoids on the contraction to U46619 ( $3 \times 10^{-8}$  M) before relaxations to bradykinin ( $10^{-11}$  to  $10^{-6}$  M) in porcine coronary arteries.

| Treatment                          | Contraction (g) |
|------------------------------------|-----------------|
| Control                            | $6.8 \pm 0.4$   |
| Ethanol (0.1 %)                    | $6.2 \pm 0.5$   |
| Kaempferol ( $3 \times 10^{-6}$ M) | $6.8 \pm 0.8$   |
| Kaempferol ( $10^{-5}$ M)          | $4.8 \pm 0.3$   |
| Apigenin ( $10^{-5}$ M)            | $5.2 \pm 0.5$   |
| Myricetin ( $10^{-5}$ M)           | $8.9 \pm 0.8$   |
| Quercetin ( $10^{-5}$ M)           | $5.9 \pm 1.0$   |
| Rutin ( $10^{-5}$ M)               | $7.7 \pm 0.7$   |

$n=4-8$  in each group.



*Supplementary Table 2.* Effects of different pharmacological treatments, in the absence or presence of kaempferol ( $3 \times 10^{-6}$  M), on the contraction to U46619 ( $3 \times 10^{-8}$  M) before relaxations to bradykinin ( $10^{-11}$  to  $10^{-6}$  M) in porcine coronary arteries.

| Treatment                                            | Contraction (g)         |                                    |
|------------------------------------------------------|-------------------------|------------------------------------|
|                                                      | Vehicle (Ethanol, 0.1%) | Kaempferol ( $3 \times 10^{-6}$ M) |
| Control                                              | $6.5 \pm 0.7$           | $7.0 \pm 0.9$                      |
| L-NAME ( $10^{-4}$ M)                                | $8.7 \pm 0.3$           | $8.6 \pm 0.7$                      |
| ODQ ( $10^{-5}$ M)                                   | $8.0 \pm 0.3$           | $7.8 \pm 0.3$                      |
| TRAM-34 ( $10^{-6}$ M) + UCL 1684 ( $10^{-6}$ M)     | $5.6 \pm 0.2$           | $5.4 \pm 0.5$                      |
| Iberiotoxin ( $10^{-7}$ M)                           | $7.6 \pm 1.0$           | $6.6 \pm 1.0$                      |
| Charybdotoxin ( $10^{-7}$ M) + Apamin ( $10^{-6}$ M) | $10.2 \pm 0.7$          | $6.4 \pm 0.4$                      |
| TEA ( $10^{-3}$ M)                                   | $10.1 \pm 1.1$          | $8.2 \pm 1.0$                      |

$n=6-8$  in each group.

Apamin, inhibitor of small-conductance calcium-activated potassium channels ( $K_{Ca2.3}$ ); charybdotoxin, inhibitor of large- ( $K_{Ca1.1}$ ) and intermediate-conductance ( $K_{Ca3.1}$ ) calcium-activated potassium channels; iberiotoxin, inhibitor of  $K_{Ca1.1}$ ; L-NAME, inhibitor of nitric oxide synthase; ODQ, inhibitor of soluble guanylyl cyclase; TEA, non-selective inhibitor of calcium-activated potassium channels; TRAM-34, inhibitor of  $K_{Ca3.1}$ ; UCL 1684, inhibitor of  $K_{Ca2.3}$

*Supplementary Table 3.* Effects of different potassium channel blockers, in the absence or presence of kaempferol ( $3 \times 10^{-6}$  M), on the  $EC_{50}$  and  $E_{max}$  values of concentration–relaxation curves of bradykinin ( $10^{-11}$  to  $10^{-6}$  M) in porcine coronary arteries contracted by U46619 ( $3 \times 10^{-8}$  M).

| Treatment                    | $EC_{50}$ (log M)          |                                       | $E_{max}$ (%)              |                                       |
|------------------------------|----------------------------|---------------------------------------|----------------------------|---------------------------------------|
|                              | Vehicle<br>(Ethanol, 0.1%) | Kaempferol<br>( $3 \times 10^{-6}$ M) | Vehicle<br>(Ethanol, 0.1%) | Kaempferol<br>( $3 \times 10^{-6}$ M) |
| Control                      | $-8.3 \pm 0.1$             | $-8.9 \pm 0.1^*$                      | $105 \pm 3.0$              | $106 \pm 2.2$                         |
| Charybdotoxin ( $10^{-7}$ M) |                            |                                       |                            |                                       |
| + Apamin ( $10^{-6}$ M)      | $-7.3 \pm 0.5$             | $-7.8 \pm 0.2$                        | $76 \pm 8.0^*$             | $85 \pm 4.1^*$                        |
| TEA ( $10^{-3}$ M)           | $-8.3 \pm 0.1$             | $-8.4 \pm 0.2$                        | $95 \pm 1.4$               | $101 \pm 2.5$                         |

$n=7-8$  in each group. \*  $p<0.05$  vs. control group

Apamin, inhibitor of small-conductance calcium-activated potassium channels; charybdotoxin, inhibitor of large- and intermediate-conductance calcium-activated potassium channels; TEA, non-selective inhibitor of calcium-activated potassium channels

*Supplementary Table 4.* Effects of large-conductance calcium-activated potassium channel blocker, in the absence or presence of kaempferol ( $3 \times 10^{-6}$  M), on the contraction to U46619 ( $3 \times 10^{-8}$  M) before relaxations to sodium nitroprusside ( $10^{-9}$  to  $10^{-4}$  M) in porcine coronary arteries.

---

| Treatment                  | Contraction (g)         |                                    |
|----------------------------|-------------------------|------------------------------------|
|                            | Vehicle (Ethanol, 0.1%) | Kaempferol ( $3 \times 10^{-6}$ M) |
| Control                    | $8.1 \pm 0.2$           | $6.2 \pm 0.5$                      |
| Iberiotoxin ( $10^{-7}$ M) | $8.0 \pm 1.2$           | $7.7 \pm 1.0$                      |

---

$n=5-6$  in each group.

Iberiotoxin, inhibitor of large-conductance calcium-activated potassium channels
